# Supplementary material for: Transcriptional Regulator DasR Represses Daptomycin Production through Both Direct and Cascade Mechanisms in Streptomyces roseosporus
Source: MDPI journal article supplement (doi:10.3390/antibiotics11081065), 2022-08-05
Supplement: s1 [file s1]

## Supplementary Material

### **Transcriptional regulator DasR represses daptomycin production through both direct and cascade mechanisms in *Streptomyces roseosporus***

Qiong Chen<sup>1#</sup>, Jianya Zhu<sup>2#</sup>, Xingwang Li<sup>1</sup>, Ying Wen<sup>1\*</sup>

<sup>1</sup>State Key Laboratory of Agrobiotechnology and College of Biological Sciences, China Agricultural University, Beijing 100193, China

<sup>2</sup>Institute of Fisheries Research, Beijing Academy of Agriculture and Forestry Sciences, Beijing 100068, China

# These authors contributed equally to the study.

\* Correspondence: wen@cau.edu.cn (Y.W.); Tel: +86-10-62732715

**Figure S1.**

**A**

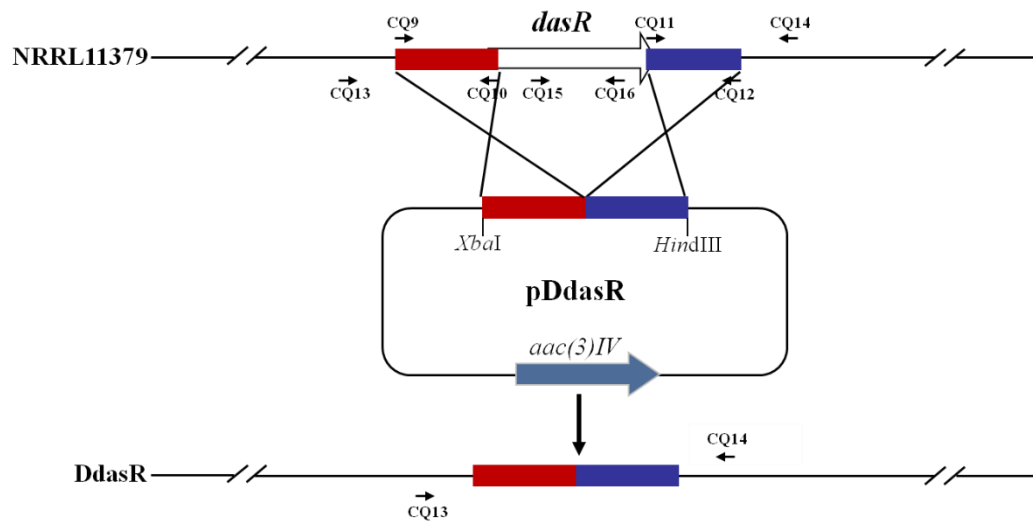

**B**

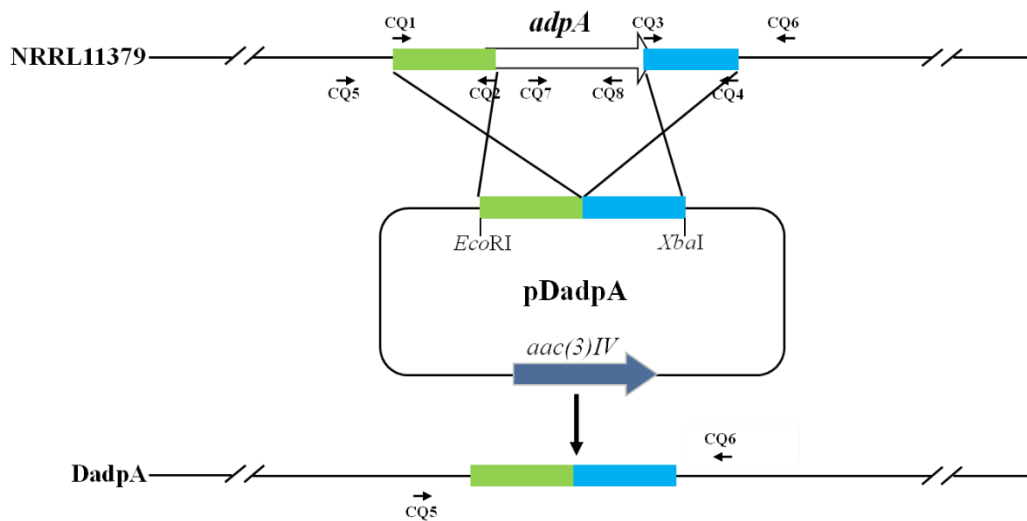

**Figure S1.** Strategy for deletion of *dasR* (A) and *adpA* (B) in WT (schematic). Large arrows: genes and their directions. Small arrows: positions of primers. Rectangles: homologous exchange regions used for gene deletion.

A

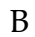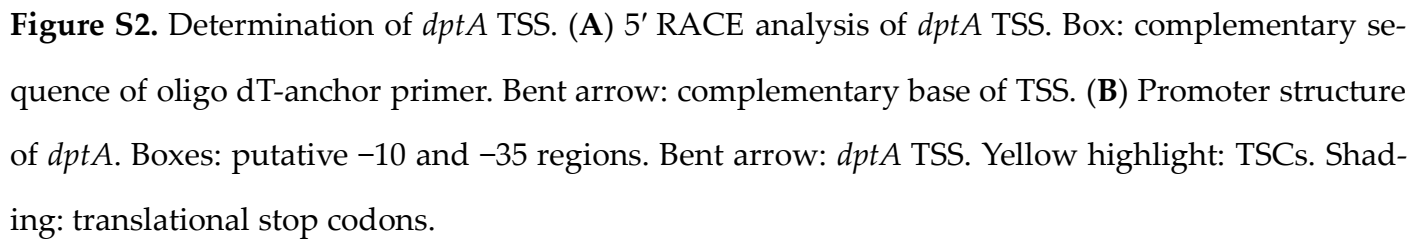

Figure S3.

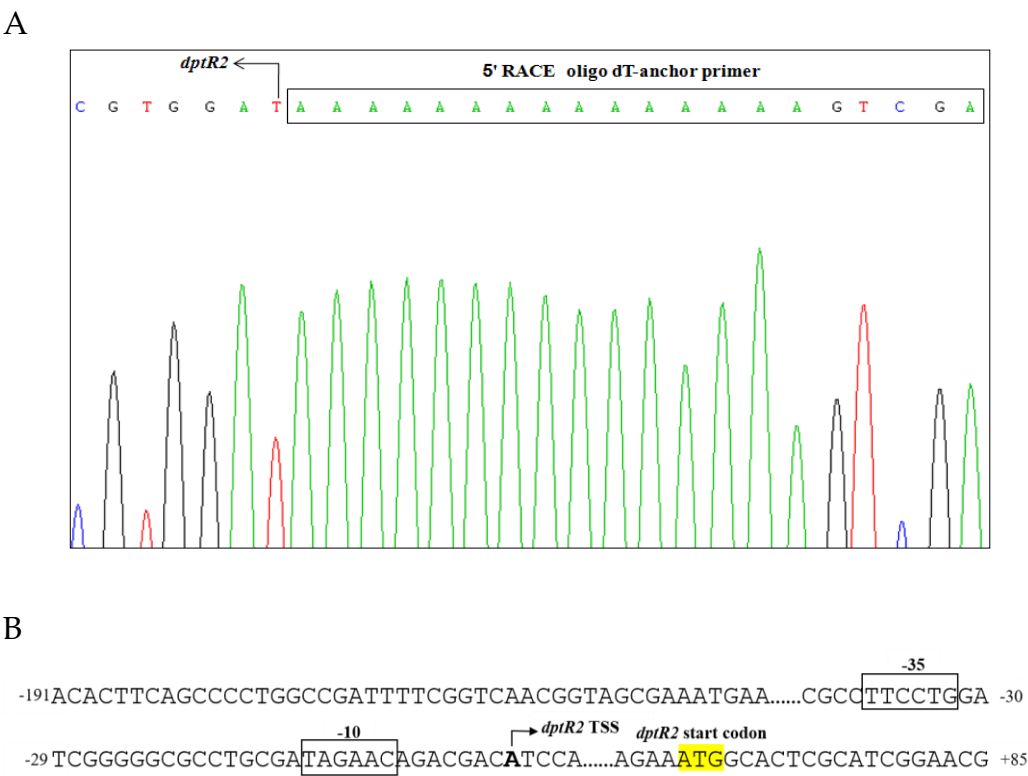

**Figure S3.** Determination of *dptR2* TSS. **(A)** 5' RACE analysis of *dptR2* TSS. Box: complementary sequence of oligo dT-anchor primer. Bent arrow: complementary base of TSS. **(B)** Promoter structure of *dptR2*. Boxes: putative -10 and -35 regions. Bent arrow: *dptR2* TSS. Yellow highlight: *dptR2* TSC.

**Table S1.** Strains and plasmids used in this study.

| Strains or plas-<br>mids | Description                                                                  | Source or reference |
|--------------------------|------------------------------------------------------------------------------|---------------------|
| <b>Strains</b>           |                                                                              |                     |
| <i>S. roseosporus</i>    |                                                                              |                     |
| NRRL11379                | WT strain, daptomycin producer                                               | Laboratory stock    |
| DdasR                    | <i>dasR</i> deletion mutant                                                  | This study          |
| CdasR                    | <i>dasR</i> complemented strain                                              | This study          |
| OdasR                    | <i>dasR</i> overexpression strain                                            | This study          |
| DadpA                    | <i>adpA</i> deletion mutant                                                  | This study          |
| CadpA                    | <i>adpA</i> complemented strain                                              | This study          |
| OadpA                    | <i>adpA</i> overexpression strain                                            | This study          |
| WT/pKC1139               | WT strain carrying empty vector pKC1139                                      | This study          |
| WT/pSET152               | WT strain carrying empty vector pSET152                                      | This study          |
| <i>E. coli</i>           |                                                                              |                     |
| JM109                    | General cloning host                                                         | Laboratory stock    |
| ET12567                  | Methylation-deficient strain                                                 | [1]                 |
| BL21 (DE3)               | Host for protein overexpression                                              | Novagen             |
| <b>Plasmids</b>          |                                                                              |                     |
| pKC1139                  | Multiple-copy <i>E. coli-Streptomyces</i> shuttle vector                     | [2]                 |
| pSET152                  | Integrative <i>E. coli-Streptomyces</i> shuttle vector                       | [2]                 |
| pET-28a (+)              | Vector for His <sub>6</sub> -tagged protein overexpression in <i>E. coli</i> | Novagen             |
| pJL117                   | pIJ2925 derivative carrying promoter <i>ermE</i> * <i>p</i>                  | [3]                 |
| pDdasR                   | <i>dasR</i> deletion vector based on pKC1139                                 | This study          |
| pCdasR                   | <i>dasR</i> complemented vector based on pSET152                             | This study          |
| pOdasR                   | <i>dasR</i> overexpression vector based on pKC1139                           | This study          |
| pET28-dasR               | His <sub>6</sub> -DasR overexpression vector based on pET-28a (+)            | This study          |
| pDadpA                   | <i>adpA</i> deletion vector based on pKC1139                                 | This study          |
| pCadpA                   | <i>adpA</i> complemented vector based on pSET152                             | This study          |
| pOadpA                   | <i>adpA</i> overexpression vector based on pKC1139                           | This study          |
| pET28-adpA               | His <sub>6</sub> -AdpA overexpression vector based on pET-28a (+)            | This study          |

**Table S2.** Primers used in this study.

| Primer | DNA sequence * (5'-3')                         | Purpose                                                    |
|--------|------------------------------------------------|------------------------------------------------------------|
| CQ9    | GCTCTAGATTTCCTTGC GGTCCTTCGG ( <i>Xba</i> I)   | Deletion of <i>dasR</i> gene                               |
| CQ10   | CTTCAGACGCGCCACGAAGGTCTCGCTCCCCGTACT           |                                                            |
| CQ11   | AGTACGGGGAGCGAGACCTTCGTGGCGCGTCTGAAG           |                                                            |
| CQ12   | CCCAAGCTTCCCGTCGGTCGGTGGGAT ( <i>Hind</i> III) | Confirmation of <i>dasR</i> deletion in mutant DdasR       |
| CQ13   | CGAGGGAGGTGTCCAGCTTC                           |                                                            |
| CQ14   | CGTCGCGCGCCATCTGAC                             |                                                            |
| CQ15   | ACCTTCGTCGCCAAGCCG                             |                                                            |
| CQ16   | GGGACAGCATGAGCATCGG                            |                                                            |
| CQ21   | CCCAAGCTTACGCAAGCGTCGGGAAGG ( <i>Hind</i> III) | Overexpression of <i>dasR</i> in <i>S. roseosporus</i>     |
| CQ22   | GCTCTAGACGGTTCACGTGATCCTGC ( <i>Xba</i> I)     |                                                            |
| CQ75   | CGGAATTC CCCACCGCGAAGACATTC ( <i>Eco</i> RI)   | Complementation of <i>dasR</i> in DdasR                    |
| CQ76   | GCTCTAGAGTTCACGTGATCCTGCTCC ( <i>Xba</i> I)    |                                                            |
| CQ25   | CGGAATTCAGTACGGGGAGCGAGACC ( <i>Eco</i> RI)    |                                                            |
| CQ26   | CCCTCGAGCGGTTACGTGATCCTGC ( <i>Xho</i> I)      | Overexpression of His <sub>6</sub> -DasR in <i>E. coli</i> |
| CQ1    | CGGAATTC TGACCCCTTCGCGGGATG ( <i>Eco</i> RI)   |                                                            |
| CQ2    | GGAACGAACCGGTCAGGATGAACAGCAGCACGGCAA           |                                                            |
| CQ3    | TTGCCGTGCTGCTGTTTCATCCTGACGCGTTCGTTCC          | Deletion of <i>adpA</i> gene                               |
| CQ4    | GCTCTAGAGTCACGGATGTCCGCCAG ( <i>Xba</i> I)     |                                                            |
| CQ5    | ACACGCCATGAGGCCGC                              |                                                            |
| CQ6    | CACAACCAGGTGCTCTGCC                            | Confirmation of <i>adpA</i> deletion in mutant DadpA       |
| CQ7    | GAACTCACCACGCCGTACG                            |                                                            |
| CQ8    | GCACATCGCCGTCGTCCA                             |                                                            |
| CQ17   | CCAAGCTTCACCGAGGGGGGCTTAGC ( <i>Hind</i> III)  | Overexpression of <i>adpA</i> in <i>S. roseosporus</i>     |
| CQ18   | GCTCTAGAGCGGGCGGATCACGATGT ( <i>Xba</i> I)     |                                                            |
| CQ19   | CGGAATTC TGACCCCTTCGCGGGATG ( <i>Eco</i> RI)   |                                                            |
| CQ20   | GCTCTAGAGCGGGCGGATCACGATGT ( <i>Xba</i> I)     | Complementation of <i>adpA</i> in DadpA                    |
| CQ23   | CGGAATTCATGAGCCAGGACTCCGCC ( <i>Eco</i> RI)    |                                                            |
| CQ24   | CCCTCGAGCGCAGTCGATCCACACCAT ( <i>Xho</i> I)    |                                                            |
| CQ27   | GCTTAGCGTCATGAGCCAG                            | Overexpression of His <sub>6</sub> -AdpA in <i>E. coli</i> |
| CQ28   | TGAACAGCAGCACGGCAA                             |                                                            |
| ZQL75  | TCCCGGGAATCGCGAGAG                             |                                                            |
| ZQL76  | CCCGGATTCCCCCGACTC                             | Amplification of <i>dptR3</i> ORF for RT-qPCR              |
| ZQL79  | GAACAGACCAACCCTCCTCG                           |                                                            |
| ZQL80  | CTGTGGCCGATGGGGTAG                             |                                                            |
| ZQL81  | CGGCGTACATCATCCAGACC                           | Amplification of <i>dptBC</i> ORF for RT-qPCR              |
| ZQL82  | GTCATGCTCAGTTCGGAGACG                          |                                                            |
| ZQL83  | GAGTGAGAGCCGCTGTGC                             |                                                            |
| ZQL84  | GGTGTCCCGTACGAGAACC                            | Amplification of <i>dptA</i> ORF for RT-qPCR               |
| ZQL85  | CCAGATCCTCTCGACGGTG                            |                                                            |
| ZQL86  | CCGATACAGGCGCGTACC                             |                                                            |
| ZQL87  | TTCCGGTACGAGCGGCTG                             | Amplification of <i>dptE</i> ORF for RT-qPCR               |
| ZQL88  | CGTCAGATCGAAGCGGCG                             |                                                            |
| ZQL89  | TCCGCACCATCACGTTTAC                            |                                                            |
| ZQL90  | GACTTCCTGGGCCACCTG                             | Amplification of <i>dptD</i> ORF for RT-qPCR               |
|        |                                                |                                                            |
|        |                                                |                                                            |

|           |                                         |                                      |
|-----------|-----------------------------------------|--------------------------------------|
| ZQL93     | GGCCAGGATCGTGACGTC                      | Amplification of <i>dptR2</i> ORF    |
| ZQL94     | CGGAACGGCAGGAGTTCATC                    | for RT-qPCR                          |
| ZQL115    | GACAGATCGCCGAGTTCGT                     | Amplification of <i>dptF</i> ORF for |
| ZQL116    | GACGCTCCACAGCAGCTC                      | RT-qPCR                              |
| ZQL117    | CTACCACGTGACCGTCAAGG                    | Amplification of <i>dptI</i> ORF for |
| ZQL118    | GTCGTCGAACTCGTTTCCCTC                   | RT-qPCR                              |
| ZQL119    | CAACGACGGCAGCTACCTC                     | Amplification of <i>dptG</i> ORF for |
| ZQL120    | GGCGCATATCGGTCCAGTTC                    | RT-qPCR                              |
| ZQL121    | CAATCCGCCGTACCAGGC                      | Amplification of <i>dptP</i> ORF for |
| ZQL122    | GGACACGCCCCGTGTTGG                      | RT-qPCR                              |
| GJ91      | CCAAGGGCTACAAGTTCTCC                    | Amplification of <i>hrdB</i> ORF     |
| GJ92      | TTGATGACCTCGACCATGTG                    | for RT-qPCR and probe <i>hrdB</i>    |
|           |                                         | for EMSA                             |
| CQ49      | ATGGCCGGACAACCCACC                      | Amplification of probe <i>adpAp</i>  |
| CQ50      | CTGGCTCATGACGCTAAGC                     | for EMSA                             |
| ZQL39     | GGCGTGGAACATACTGGCG                     | Amplification of probe <i>dptEp</i>  |
| ZQL40     | GCACAGCGGCTCTCACTC                      | for EMSA                             |
| ZQL43     | CGAGGTCACCGCGTGGAT                      | Amplification of probe <i>dptAp</i>  |
| ZQL44     | GTCCATCTCTCGCGGATCC                     | for EMSA                             |
| ZQL51     | CCGTTCCGATGCGAGTGC                      | Amplification of probe <i>dptR2p</i> |
| ZQL52     | CGTGCAGGAAGGTGTTCCG                     | for EMSA                             |
| ZQL37     | TCCCGGGAATCGCGAGAG                      | Amplification of probe <i>dptR3p</i> |
| ZQL38     | GAAGAGGCGGAGGATGCG                      | for EMSA                             |
| ZQL47     | GCGCGGTCAACAAGATTCTT                    | Amplification of probe <i>dptIp</i>  |
| ZQL48     | CCTTGACGGTCACGTGGTAG                    | for EMSA                             |
| ZQL57     | CGGTCCGAACCGGCTCTTG                     | Amplification of probe <i>dptP-M</i> |
| ZQL58     | AGGCGCTGCGGATCGATG                      | for EMSA                             |
| CQ61      | ACCCGCCTTCCCTGACCC, 5' FAM              | Amplification of <i>adpAp</i> for    |
| CQ62      | CCTGGCTCATGACGCTAAGC                    | DNase I footprinting                 |
| CQ63      | CGCACCGGACGCCCTGAC, 5' FAM              | Amplification of <i>dptEp</i> for    |
| CQ64      | GGCACAGCGGCTCTCACTC                     | DNase I footprinting                 |
| CQ65      | CCGTTCCGATGCGAGTGC                      | Amplification of <i>dptR2p</i> for   |
| CQ66      | AACAGCCGGTGAGTGTGC, 5' FAM              | DNase I footprinting                 |
| CQ67      | CGAGGTCACCGCGTGGAT, 5' FAM              | Amplification of <i>dptAp</i> for    |
| CQ68      | GGTTTCGAGGATCTGCAGCAG                   | DNase I footprinting                 |
| Oligo     | GACCACGCGTATCGATGTCGACTTTTTTTTTTTTTTTTV | For 5' RACE                          |
| dT-anchor |                                         |                                      |
| primer    |                                         |                                      |
| Anchor    | GACCACGCGTATCGATGTCGAC                  | For 5' RACE                          |
| primer    |                                         |                                      |
| CQ72      | GGGGACGCTCCACAGCAG                      | dptA-SP1 for 5' RACE                 |
| CQ73      | CGCAGAGGGCAACTCCGG                      | dptA-SP2 for 5' RACE                 |
| CQ74      | GATCCGGTCGGGTGTCTC                      | dptA-SP3 for 5' RACE                 |
| ZQL69     | GACGTTTCAGCGAGCCCAG                     | dptR2-SP1 for 5' RACE                |
| ZQL70     | GCGTCGTAGGCGGAAGCG                      | dptR2-SP2 for 5' RACE                |
| ZQL71     | CGCGATAGGGGAGGGTGACG                    | dptR2-SP3 for 5' RACE                |

\* Underlining: sequence of restriction enzyme shown in parentheses.

## References

1. Macneil, D.J.; Klapko, L.M. Transformation of *Streptomyces avermitilis* by plasmid DNA. *J. Ind. Microbiol.* **1987**, *2*, 209-218.
2. Bierman, M.; Logan, R.; O'Brien, K.; Seno, E.T.; Rao, R.N.; Schoner, B.E. Plasmid cloning vectors for the conjugal transfer of DNA from *Escherichia coli* to *Streptomyces* spp. *Gene* **1992**, *116*, 43-49.
3. Li, L.; Guo, J.; Wen, Y.; Chen, Z.; Song, Y.; Li, J. Overexpression of ribosome recycling factor causes increased production of avermectin in *Streptomyces avermitilis* strains. *J. Ind. Microbiol. Biotechnol.* **2010**, *37*, 673-679.
